# Supplementary material for: Genomic and Proteomic Analysis of Schizaphis graminum Reveals Cyclophilin Proteins Are Involved in the Transmission of Cereal Yellow Dwarf Virus
Source: PubMed Central journal article supplement (PMC3739738; doi:10.1371/journal.pone.0071620), 2013-08-09
Supplement: pone.0071620.s001.pdf [file pone.0071620.s001.pdf]

>Biotype H Cyclophilin Contig Partial

23879 (translated in frame 1)

TMASTTFRLE TRRQFLYCST PNHSYTGGLA SFLLYSTKSK PSSSKMSLPK  
VFFDMTADGE QLGRITIELR SDVVPKTAEN FRALCTGKKG FGYKGSIFHR  
VIPNFMCGGG DFTNHNGTGG KSIYGNKFED ENFTLKHTGP GILSMANAGA  
NTNGSQFFIT TVKTSWLDTK HVVFGAIVDG MDVVKKIESY GTQSGKTTKK  
ITVANCGQLS
