# Supplementary material for: Genomic and Proteomic Analysis of Schizaphis graminum Reveals Cyclophilin Proteins Are Involved in the Transmission of Cereal Yellow Dwarf Virus
Source: PubMed Central journal article supplement (PMC3739738; doi:10.1371/journal.pone.0071620), 2013-08-09
Supplement: pone.0071620.s002.pdf [file pone.0071620.s002.pdf]

Figure S2

```

.....|.....|.....|.....|.....|.....|
      10   20   30   40   50
CV      ATGATATCTA CTTATAAAAT CATGACGTTA TGAATAATGG CTATATTGGC
CNV1    ATGATATCTA CTTATAAAAT CATGACGTTA TGAATAATGG CTATATTGGC
CNV2    ATGATATCTA CTTATAAAAT CATGACGTTA TGAATAATGG CTATATTGGC
CNV3    ATGATATCTA CTTATAAAAT CATGACGTTA TGAATAATGG CTATATTGGC
CNV4    ATGATATCTA CTTATAAAAT CATGACGTTA TGAATAATGG CTATATTGGC

.....|.....|.....|.....|.....|.....|
      60   70   80   90   *   100
CV      GTTAACGGTA TTCACGATT  TAGTGGTGA TAGCCAAGCA TTAGAGAGCC
CNV1    GTTAACGGTA TTCACGATT  TAGTGGTGA TAGCCAAGCA TTAGAGAGCC
CNV2    GTTAACGGTA TTCACGATT  TAGTGGTGA TAGCCAAGCA TTAGAGAGCC
CNV3    GTTAACGGTA TTCACGATT  TAGTGGTGA TAGCCAAGCA TTAGAGAGCC
CNV4    GTTAACGGTA TTCACGATT  TAGTGGTGA TAGCCAAGCA TTAGAGAGCC

.....|.....|.....|.....|.....|.....|
      110  120  130  140  150
CV      CACAGAAGAA AGGACCTAAG GTCACCTGACA TTGTATGGT  CGACATCAAA
CNV1    CACAGAAGAA AGGACCTAAG GTCACCTGACA TTGTATGGT  CGACATCAAA
CNV2    CACAGAAGAA AGGACCTAAG GTCACCTGACA TTGTATGGT  CGACATCAAA
CNV3    CACAGAAGAA AGGACCTAAG GTCACCTGACA TTGTATGGT  CGACATCAAA
CNV4    CACAGAAGAA AGGACCTAAG GTCACCTGACA TTGTATGGT  CGACATCAAA

.....|.....|.....|.....|.....|.....|
      160  170  180  190  200
CV      ATTGGTTCAA GTGAACCTCA ACOTGTGGAA ATCGGAGTAT TTGGTGCAC
CNV1    ATTGGTTCAA GTGAACCTCA ACOTGTGGAA ATCGGAGTAT TTGGTGCAC
CNV2    ATTGGTTCAA GTGAACCTCA ACOTGTGGAA ATCGGAGTAT TTGGTGCAC
CNV3    ATTGGTTCAA GTGAACCTCA ACOTGTGGAA ATCGGAGTAT TTGGTGCAC
CNV4    ATTGGTTCAA GTGAACCTCA ACOTGTGGAA ATCGGAGTAT TTGGTGCAC

.....|.....|.....|.....|.....|.....|
      210  220  230  240  250
CV      TGTACCTAAA ACTGCAAGAA ATTTTATGA ACTAGCAAAA AAACCGAAG
CNV1    TGTACCTAAA ACTGCAAGAA ATTTTATGA ACTAGCAAAA AAACCGAAG
CNV2    TGTACCTAAA ACTGCAAGAA ATTTTATGA ACTAGCAAAA AAACCGAAG
CNV3    TGTACCTAAA ACTGCAAGAA ATTTTATGA ACTAGCAAAA AAACCGAAG
CNV4    TGTACCTAAA ACTGCAAGAA ATTTTATGA ACTAGCAAAA AAACCGAAG

.....|.....|.....|.....|.....|.....|
      260  270  280  290  300
CV      GTGAAGGATA CAAGGGCAGT AAATTCCTATA GAGTTATCAA AGACTTCATG
CNV1    GTGAAGGATA CAAGGGCAGT AAATTCCTATA GAGTTATCAA AGACTTCATG
CNV2    GTGAAGGATA CAAGGGCAGT AAATTCCTATA GAGTTATCAA AGACTTCATG
CNV3    GTGAAGGATA CAAGGGCAGT AAATTCCTATA GAGTTATCAA AGACTTCATG
CNV4    GTGAAGGATA CAAGGGCAGT AAATTCCTATA GAGTTATCAA AGACTTCATG

.....|.....|.....|.....|.....|.....|
      310  320  330  340  350
CV      ATCCAAGGAG GTGATTTTAC AAAGGTGAC GGCACAGTG GTCCGAGTAT
CNV1    ATCCAAGGAG GTGATTTTAC AAAGGTGAC GGCACAGTG GTCCGAGTAT
CNV2    ATCCAAGGAG GTGATTTTAC AAAGGTGAC GGCACAGTG GTCCGAGTAT
CNV3    ATCCAAGGAG GTGATTTTAC AAAGGTGAC GGCACAGTG GTCCGAGTAT
CNV4    ATCCAAGGAG GTGATTTTAC AAAGGTGAC GGCACAGTG GTCCGAGTAT

.....|.....|.....|.....|.....|.....|
      360  370  380  390  400
CV      TTTTGGTGA AAAGTTGCG ATGAAAACCT CAACTGAAA CATTATGGT
CNV1    TTTTGGTGA AAAGTTGCG ATGAAAACCT CAACTGAAA CATTATGGT
CNV2    TTTTGGTGA AAAGTTGCG ATGAAAACCT CAACTGAAA CATTATGGT
CNV3    TTTTGGTGA AAAGTTGCG ATGAAAACCT CAACTGAAA CATTATGGT
CNV4    TTTTGGTGA AAAGTTGCG ATGAAAACCT CAACTGAAA CATTATGGT

.....|.....|.....|.....|.....|.....|
      410  420  430  440  450
CV      CTGGATGGT GTCTATGGC AATGCAGAA AAGATACCAA TGGATCTCAA
CNV1    CTGGATGGT GTCTATGGC AATGCAGAA AAGATACCAA TGGATCTCAA
CNV2    CTGGATGGT GTCTATGGC AATGCAGAA AAGATACCAA TGGATCTCAA
CNV3    CTGGATGGT GTCTATGGC AATGCAGAA AAGATACCAA TGGATCTCAA
CNV4    CTGGATGGT GTCTATGGC AATGCAGAA AAGATACCAA TGGATCTCAA

.....|.....|.....|.....|.....|.....|
      460  470  480  490  500
CV      TTTTCATTA CCACAAACA AACTTCTGG TTGACGGTC GCAATGTTG
CNV1    TTTTCATTA CCACAAACA AACTTCTGG TTGACGGTC GCAATGTTG
CNV2    TTTTCATTA CCACAAACA AACTTCTGG TTGACGGTC GCAATGTTG
CNV3    TTTTCATTA CCACAAACA AACTTCTGG TTGACGGTC GCAATGTTG
CNV4    TTTTCATTA CCACAAACA AACTTCTGG TTGACGGTC GCAATGTTG

.....|.....|.....|.....|.....|.....|
      510  520  530  540  550
CV      GTTTGAAAA ATAATCAAAG GAATGAAAAC AATTAGACA GCTGAATCAG
CNV1    GTTTGAAAA ATAATCAAAG GAATGAAAAC AATTAGACA GCTGAATCAG
CNV2    GTTTGAAAA ATAATCAAAG GAATGAAAAC AATTAGACA GCTGAATCAG
CNV3    GTTTGAAAA ATAATCAAAG GAATGAAAAC AATTAGACA GCTGAATCAG
CNV4    GTTTGAAAA ATAATCAAAG GAATGAAAAC AATTAGACA GCTGAATCAG

.....|.....|.....|.....|.....|.....|
      560  570  580  590  600
CV      CAGAAACTGA TTCAGAGAC AAACCAATGG AAAATATAGT AATTATCGAT
CNV1    CAGAAACTGA TTCAGAGAC AAACCAATGG AAAATATAGT AATTATCGAT
CNV2    CAGAAACTGA TTCAGAGAC AAACCAATGG AAAATATAGT AATTATCGAT
CNV3    CAGAAACTGA TTCAGAGAC AAACCAATGG AAAATATAGT AATTATCGAT
CNV4    CAGAAACTGA TTCAGAGAC AAACCAATGG AAAATATAGT AATTATCGAT

.....|.....|.....|.....|.....|.....|
      610  620  630  640  650
CV      AGTGGCCACA CCGTCATTC TGAGCCATAC CCACTCAGCA AAACCTGATC
CNV1    AGTGGCCACA CCGTCATTC TGAGCCATAC CCACTCAGCA AAACCTGATC
CNV2    AGTGGCCACA CCGTCATTC TGAGCCATAC CCACTCAGCA AAACCTGATC
CNV3    AGTGGCCACA CCGTCATTC TGAGCCATAC CCACTCAGCA AAACCTGATC
CNV4    AGTGGCCACA CCGTCATTC TGAGCCATAC CCACTCAGCA AAACCTGATC

.....|.....|
660
CV      TACCGAATA
CNV1    TACCGAATA
CNV2    TACCGAATA
CNV3    TACCGAATA
CNV4    TACCGAATA

```
