# Supplementary material for: Genomic and Proteomic Analysis of Schizaphis graminum Reveals Cyclophilin Proteins Are Involved in the Transmission of Cereal Yellow Dwarf Virus
Source: PubMed Central journal article supplement (PMC3739738; doi:10.1371/journal.pone.0071620), 2013-08-09

**A**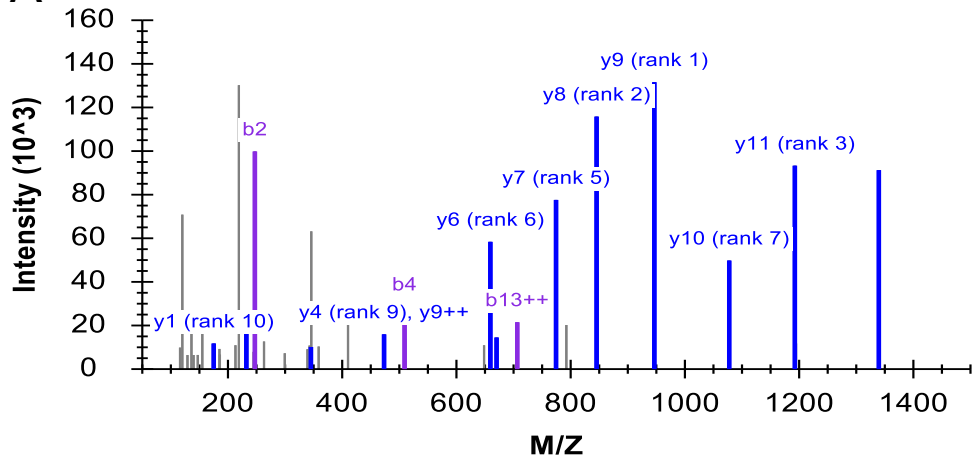**B**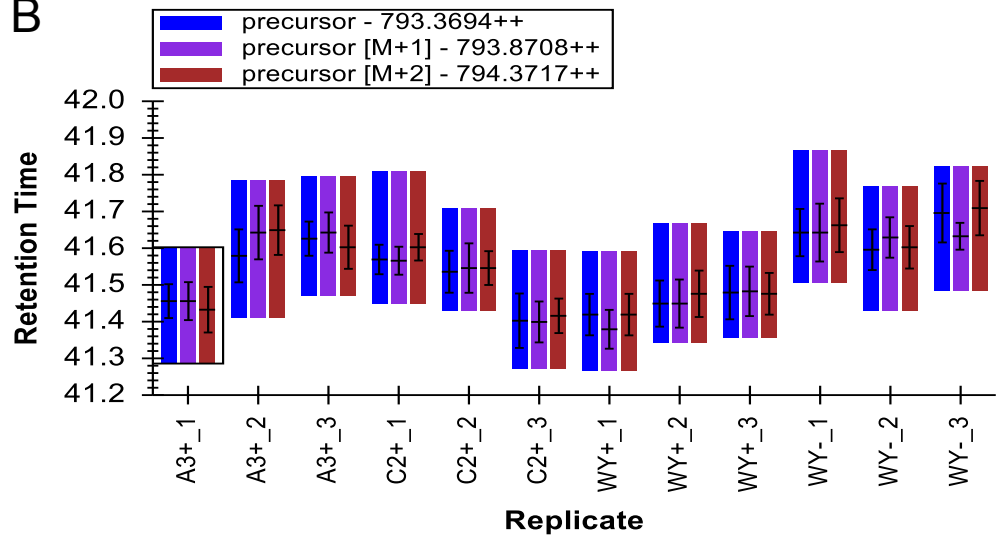**C**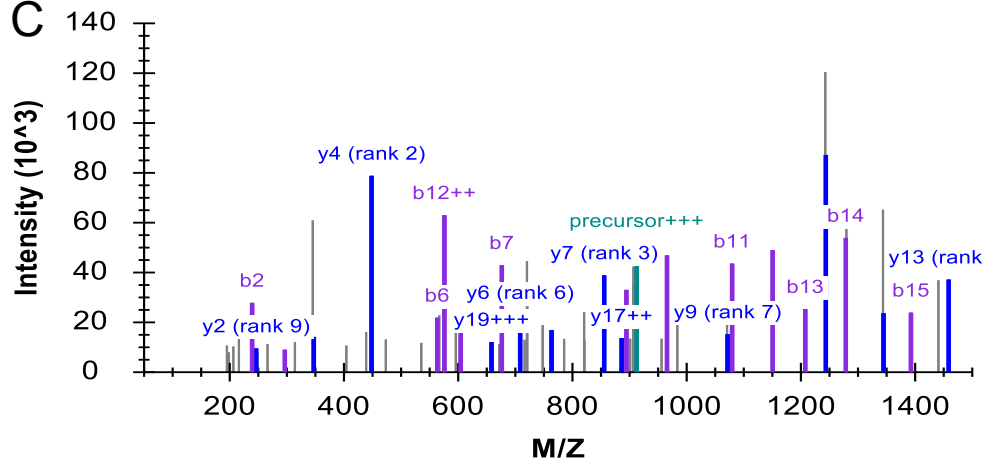**D**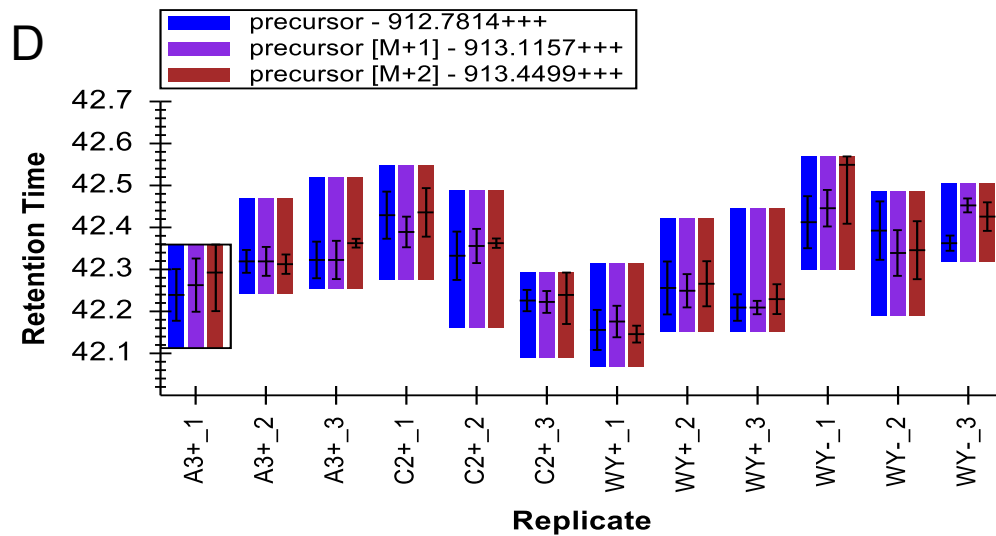

Supplement: pone.0071620.s003.pdf [file pone.0071620.s003.pdf]
