# Supplementary material for: Genomic and Proteomic Analysis of Schizaphis graminum Reveals Cyclophilin Proteins Are Involved in the Transmission of Cereal Yellow Dwarf Virus
Source: PubMed Central journal article supplement (PMC3739738; doi:10.1371/journal.pone.0071620), 2013-08-09
Supplement: pone.0071620.s005.pdf [file pone.0071620.s005.pdf]

## Cyclophilin A Peptides in WY-10A + CYDV-RPV

| Sequence                          | Prob | Mascot Ion score | Mascot Identity score | Modifications                                                            | Observed | Actual Mass | Charge | Delta AMU | Delta PPM | Retention Time | TIC     |
|-----------------------------------|------|------------------|-----------------------|--------------------------------------------------------------------------|----------|-------------|--------|-----------|-----------|----------------|---------|
| (-)HTGPGILSMAnAGANTNGSQFFITTVK(-) | 95%  | 27.78            | 38.50033              | Deamidation (+1), Deamidation (+1)                                       | 912.79   | 2,735.35    | 3      | 0.02547   | 9.308     | 2,527.75       | 645612  |
| (-)HTGPGILSMANAGANTnGSQFFITTVK(-) | 95%  | 55.43            | 38.287888             | Oxidation (+16), Deamidation (+1)                                        | 917.78   | 2,750.32    | 3      | -0.01543  | -5.608    | 2,359.09       | 1875350 |
| (-)JTSWLDTK(-)                    | 64%  | 20.14            | 43.905643             |                                                                          | 425.7181 | 849.4216    | 2      | -0.001736 | -2.041    | 1,885.01       | 3813160 |
| (-)VFFDMTADGEQLGR(-)              | 95%  | 61.19            | 41.564884             |                                                                          | 793.37   | 1,584.73    | 2      | 0.0009781 | 0.6168    | 2,478.46       | 1552970 |
| (-)VFFDMTADGEQLGR(-)              | 95%  | 92.77            | 41.404766             | Oxidation (+16)                                                          | 801.3665 | 1,600.72    | 2      | -0.001009 | -0.6299   | 2,233.40       | 1735810 |
| (-)HTGPGILSMANAGANTNGSQFFITTVK(-) | 69%  | 20.75            | 38.287888             | Oxidation (+16), Deamidation (+1),<br>Oxidation (+16), Deamidation (+1), | 917.78   | 2,750.32    | 3      | -0.01543  | -5.608    | 2,356.14       | 713233  |
| (-)HTGPGILSMAnAGAnTnGSQFFITTVK(-) | 95%  | 43.67            | 38.25556              | Deamidation (+1), Deamidation (+1)                                       | 918.46   | 2,752.36    | 3      | 0.05654   | 20.53     | 2,361.11       | 2948960 |
| (-)HTGPGILSMANAGANTnGSQFFITTVK(-) | 95%  | 48.83            | 38.50033              | Deamidation (+1), Deamidation (+1)                                       | 912.79   | 2,735.35    | 3      | 0.02547   | 9.308     | 2,532.09       | 2001440 |
| (-)HVVFGAIVDGMDDVVK(-)            | 82%  | 20.79            | 41.58875              |                                                                          | 529.2848 | 1,584.83    | 3      | -0.001031 | -0.6501   | 2,376.83       | 2864390 |
| (-)VFFDMTADGEQLGR(-)              | 77%  | 29.58            | 41.58875              | Deamidation (+1),<br>Oxidation (+16), Deamidation (+1),                  | 793.87   | 1,585.73    | 2      | 0.01696   | 10.69     | 2,484.56       | 1700880 |
| (-)HTGPGILSMAnAGAnTnGSQFFITTVK(-) | 95%  | 32.54            | 38.26269              | Deamidation (+1), Deamidation (+1)                                       | 918.45   | 2,752.33    | 3      | 0.02654   | 9.639     | 2,355.99       | 1501800 |
| (-)HTGPGILSMANAGANTNGSQFFITTVK(-) | 95%  | 35.95            | 38.501556             | Deamidation (+1)                                                         | 912.4541 | 2,734.34    | 3      | 0.0019    | 0.6946    | 2,533.83       | 1052200 |
| (-)HTGPGILSMANAGANTnGSQFFITTVK(-) | 95%  | 79.43            | 38.287888             | Oxidation (+16), Deamidation (+1)                                        | 917.78   | 2,750.32    | 3      | -0.01543  | -5.608    | 2,358.48       | 2513270 |
| (-)JTSWLDTK(-)                    | 62%  | 21.51            | 44.02657              |                                                                          | 425.7189 | 849.4233    | 2      | -7.79E-05 | -0.09165  | 1,893.63       | 4262090 |
| (-)VFFDMTADGEQLGR(-)              | 91%  | 38.21            | 41.476143             | Oxidation (+16), Deamidation (+1)                                        | 801.87   | 1,601.73    | 2      | 0.02205   | 13.76     | 2,240.35       | 2444640 |
| (-)VFFDMTADGEQLGR(-)              | 95%  | 53.1             | 41.653038             |                                                                          | 793.3746 | 1,584.73    | 2      | 0.01016   | 6.406     | 2,482.54       | 2090840 |

## Cyclophilin A Peptides in A3 + CYDV-RPV

| Sequence                          | Prob | Mascot Ion score | Mascot Identity score | Modifications                                             | Observed | Actual Mass | Charge | Delta AMU | Delta PPM | Retention Time | TIC     |
|-----------------------------------|------|------------------|-----------------------|-----------------------------------------------------------|----------|-------------|--------|-----------|-----------|----------------|---------|
| (-)HVVFGAIVDGMDEVK(-)             | 79%  | 27.01            | 41.690273             |                                                           | 529.28   | 1,584.82    | 3      | -0.0154   | -9.71     | 2,370.15       | 2921050 |
| (-)HTGPGILSMANAGANTnGSQFFITTVK(-) | 83%  | 22.68            | 38.459038             | Deamidation (+1)<br>Oxidation (+16), Deamidation          | 912.46   | 2,734.36    | 3      | 0.01949   | 7.124     | 2,540.69       | 610166  |
| (-)HTGPGILSMANAGANTnGSqFFITTVK(-) | 89%  | 24.41            | 38.219063             | (+1), Deamidation (+1)<br>Oxidation (+16), Deamidation    | 918.12   | 2,751.34    | 3      | 0.02056   | 7.468     | 2,362.20       | 402686  |
| (-)HTGPGILSMANAGANTNGSqFFITTVK(-) | 95%  | 29.03            | 38.287888             | (+1)                                                      | 917.78   | 2,750.32    | 3      | -0.01543  | -5.608    | 2,362.81       | 554338  |
| (-)HVVFGAIVDGMDEVK(-)             | 95%  | 33.13            | 41.4192               |                                                           | 529.29   | 1,584.85    | 3      | 0.0146    | 9.208     | 2,387.09       | 3703190 |
| (-)KITVANcGqLS(-)                 | 88%  | 37.49            | 42.631386             | MMTS (+46), Deamidation (+1)                              | 590.8    | 1,179.59    | 2      | 0.02254   | 19.09     | 2,081.77       | 2335780 |
| (-)VFFDmTADGEQLGR(-)              | 95%  | 70.32            | 41.48078              | Oxidation (+16)<br>Deamidation (+1),<br>Deamidation (+1), | 801.37   | 1,600.73    | 2      | 0.006063  | 3.785     | 2,247.65       | 1183890 |
| (-)HTGPGILSMANAGANTnGSqFFITTVK(-) | 88%  | 24.94            | 38.464607             | Deamidation (+1)<br>Oxidation (+16), Deamidation          | 913.12   | 2,736.34    | 3      | 0.03145   | 11.49     | 2,537.65       | 714449  |
| (-)HTGPGILSMANAGANTnGSQFFITTVK(-) | 95%  | 41.75            | 38.219063             | (+1), Deamidation (+1)                                    | 918.12   | 2,751.34    | 3      | 0.02056   | 7.468     | 2,360.27       | 1466190 |
| (-)VFFDmTADGEQLGR(-)              | 59%  | 23.34            | 41.58875              | Deamidation (+1)                                          | 793.87   | 1,585.73    | 2      | 0.01696   | 10.69     | 2,488.13       | 848372  |
| (-)VFFDmTADGEQLGR(-)              | 92%  | 27.17            | 41.564884             |                                                           | 793.37   | 1,584.73    | 2      | 0.0009781 | 0.6168    | 2,486.35       | 361384  |
| (-)VFFDmTADGEQLGR(-)              | 95%  | 62.81            | 41.48078              | Oxidation (+16)                                           | 801.37   | 1,600.73    | 2      | 0.006063  | 3.785     | 2,243.06       | 1013440 |

## Cyclophilin A Peptides in C2 + CYDV-RPV

| Sequence                          | Prob | Mascot Ion score | Mascot Identity score | Modifications    | Observed | Actual Mass | Charge | Delta AMU | Delta PPM | Retention Time | TIC     |
|-----------------------------------|------|------------------|-----------------------|------------------|----------|-------------|--------|-----------|-----------|----------------|---------|
| (-)TSWLDTK(-)                     | 69%  | 21.71            | 43.9014               |                  | 425.7183 | 849.4221    | 2      | -0.001258 | -1.479    | 1,886.12       | 3759660 |
|                                   |      |                  |                       | Oxidation (+16), |          |             |        |           |           |                |         |
| (-)VFFDmTADGEqLGR(-)              | 95%  | 41.67            | 41.19223              | Deamidation (+1) | 801.86   | 1,601.71    | 2      | 0.002047  | 1.277     | 2,238.79       | 1162610 |
| (-)VFFDmTADGEQLGR(-)              | 95%  | 61.77            | 41.543327             |                  | 793.3686 | 1,584.72    | 2      | -0.001734 | -1.093    | 2,481.68       | 2352210 |
| (-)HVVFGAIVDGMVVVK(-)             | 95%  | 41.22            | 41.543938             |                  | 529.2861 | 1,584.84    | 3      | 0.002965  | 1.87      | 2,383.40       | 3269700 |
| (-)VFFDmTADGEQLGR(-)              | 95%  | 51.41            | 41.48078              | Oxidation (+16)  | 801.37   | 1,600.73    | 2      | 0.006063  | 3.785     | 2,245.20       | 828331  |
| (-)VFFDmTADGEQLGR(-)              | 95%  | 56.4             | 41.564884             |                  | 793.37   | 1,584.73    | 2      | 0.0009781 | 0.6168    | 2,489.43       | 1295000 |
|                                   |      |                  |                       | Oxidation (+16), |          |             |        |           |           |                |         |
| (-)HTGPGILSmANAGANTnGSQFFITTVK(-) | 95%  | 47.92            | 38.287888             | Deamidation (+1) | 917.78   | 2,750.32    | 3      | -0.01543  | -5.608    | 2,361.08       | 1140990 |
| (-)HVVFGAIVDGMVVVK(-)             | 95%  | 40.28            | 41.690273             |                  | 529.28   | 1,584.82    | 3      | -0.0154   | -9.71     | 2,378.00       | 4093830 |
| (-)TSWLDTK(-)                     | 77%  | 26.71            | 43.95868              |                  | 425.72   | 849.4254    | 2      | 0.002078  | 2.444     | 1,895.10       | 3589260 |
| (-)VFFDmTADGEQLGR(-)              | 95%  | 55.93            | 41.48078              | Oxidation (+16)  | 801.37   | 1,600.73    | 2      | 0.006063  | 3.785     | 2,241.04       | 1048380 |
| (-)VFFDmTADGEQLGR(-)              | 95%  | 80.43            | 41.54515              |                  | 793.3694 | 1,584.72    | 2      | -0.000188 | -0.1185   | 2,492.99       | 8309720 |

Cyclophilin A Peptides in Control (aphid proteins and no virus)

| Sequence              | Prob | Mascot Ion score | Mascot Identity score | Modifications   | Observed | Actual Mas: Charge | Delta AMU   | Delta PPM | Retention Time | TIC     |
|-----------------------|------|------------------|-----------------------|-----------------|----------|--------------------|-------------|-----------|----------------|---------|
| (-)HVVFGAIVDGmDVVK(-) | 64%  | 16.9             | 41.627136             | Oxidation (+16) | 534.6172 | 1,600.83           | 3 0.001398  | 0.8728    | 2,124.98       | 2965170 |
| (-)VFFDmTADGEQLGR(-)  | 95%  | 79.31            | 41.168068             | Oxidation (+16) | 801.36   | 1,600.71           | 2 -0.01394  | -8.701    | 2,244.24       | 2301320 |
| (-)HVVFGAIVDGmDVVK(-) | 67%  | 17.42            | 41.66104              | Oxidation (+16) | 534.6159 | 1,600.83           | 3 -0.002565 | -1.601    | 2,121.58       | 7153260 |
| (-)HVVFGAIVDGMDVVK(-) | 77%  | 21.63            | 41.537537             |                 | 529.2865 | 1,584.84           | 3 0.004213  | 2.657     | 2,380.27       | 1628660 |
| (-)VFFDmTADGEQLGR(-)  | 95%  | 52.9             | 41.564884             |                 | 793.37   | 1,584.73           | 2 0.0009781 | 0.6168    | 2,488.48       | 766518  |
| (-)VFFDmTADGEQLGR(-)  | 95%  | 79.06            | 41.48078              | Oxidation (+16) | 801.3696 | 1,600.72           | 2 0.005291  | 3.303     | 2,244.78       | 1092710 |
